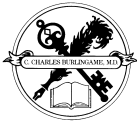

## Call for Nominations

The Institute of Living/Hartford Hospital is pleased to announce that nominations are now being accepted for the 2023 C. Charles Burlingame Award. This award, honoring an outstanding leader in psychiatric education, research or administration, is made in the memory of Dr. Burlingame, psychiatrist-in-chief from 1931 to 1950.

We invite you to nominate a person who has significantly advanced the field of psychiatry. The nomination must include a current curriculum vitae and two letters of support describing the candidate's achievements.

The Institute of Living is a comprehensive behavioral health system for the evaluation and treatment of psychiatric and addiction disorders. We offer a full continuum of services to patients and remain committed to the highest standards of clinical care, research and education.

### Past Recipients

|                                       |                                   |
|---------------------------------------|-----------------------------------|
| 1988 Robert Kellner, M.D., Ph.D.      | 2006 Daniel N. Stern, M.D.        |
| 1989 William T. Carpenter, Jr., M.D.  | 2007 Jerrold F. Rosenbaum, M.D.   |
| 1990 Dennis P. Cantwell, M.D.         | 2008 K. Ranga Rama Krishnan, M.D. |
| 1991 George E. Vaillant, M.D.         | 2009 David J. Kupfer, M.D.        |
| 1992 A. John Rush, M.D.               | 2010 Professor Sir Michael Rutter |
| 1993 John C. Nemiah, M.D.             | 2011 Jeffrey A. Lieberman, M.D.   |
| 1994 Maurice J. Martin, M.D.          | 2012 Judith L. Rapoport, M.D.     |
| 1995 Otto F. Kernberg, M.D.           | 2013 Nora D. Volkow, M.D.         |
| 1996 Charles P. O'Brien, M.D., Ph.D.  | 2014 Daniel R. Weinberger, M.D.   |
| 1997 Glen Owen Gabbard, M.D.          | 2015 David A. Brent, M.D.         |
| 1998 Lissy F. Jarvik, M.D., Ph.D.     | 2016 Steven S. Sharfstein, M.D.   |
| 1999 Nancy C. Andreasen, M.D., Ph.D.  | 2017 Harold Alan Pincus, M.D.     |
| 2000 Lewis L. Judd, M.D.              | 2018 Kenneth S. Kendler, M.D.     |
| 2001 Paul S. Appelbaum, M.D.          | 2019 Max Fink, M.D.               |
| 2002 Charles B. Nemeroff, M.D., Ph.D. | 2020 Ned H. Kalin, M.D.           |
| 2003 Dilip V. Jeste, M.D.             | 2021 Herbert Y. Meltzer, M.D.     |
| 2004 David H. Barlow, Ph.D.           | 2022 Boris Birmaher, M.D.         |
| 2005 Herbert D. Kleber, M.D.          |                                   |

Nominations should be sent no later than June 30, 2023 to:  
Javeed Sukhera, M.D., Ph.D., FRCPC  
Chair/Chief of Psychiatry  
Institute of Living/Hartford Hospital  
200 Retreat Ave., Hartford, CT 06106  
or e-mail to [Faye.Jenkins@hhhealth.org](mailto:Faye.Jenkins@hhhealth.org)

**Hartford  
HealthCare**  
Institute of Living

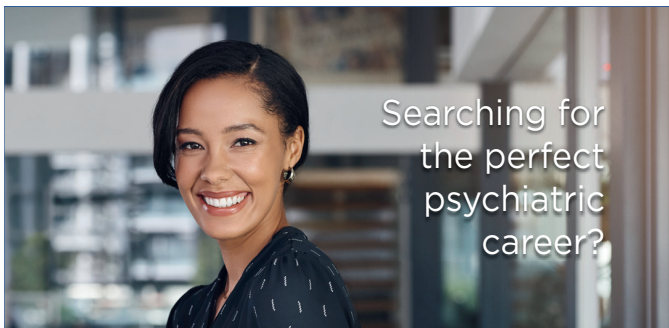

Searching for  
the perfect  
psychiatric  
career?

## Let APA JobCentral help!

### Manage Your Career

- Browse hundreds of active job listings!
- Create an account to save jobs, store multiple resumes and cover letters and communicate with employers through our internal messaging system.
- Set up multiple job alerts specifying your skills, interests and location to receive e-mails when employers post jobs that match your criteria.

### Recruit for Open Positions

- Post your job in front of thousands of highly qualified psychiatrists.
- Cross promote your job listing in Psychiatric News.
- Search the anonymous resume database to find your ideal candidate.

[jobs.psychiatry.org](http://jobs.psychiatry.org)

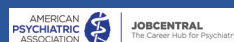

AH2203

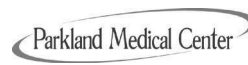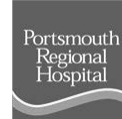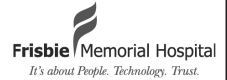

## HOSPITAL EMPLOYED PSYCHIATRY OPPORTUNITIES IN NEW HAMPSHIRE

Portsmouth Regional Hospital, Parkland Medical Center and Frisbie Memorial Hospital are seeking BC/BE Psychiatrists to join their HCA employed practices in New Hampshire. HCA is one of the nation's leading providers of healthcare services. You will work with a supportive and energetic multi-disciplinary team that employs creativity and compassion in their work with patients, families and caregivers.

### Opportunities Available:

- **GME Consult Liaison**—Portsmouth, NH— Clinical/Teaching Opportunity; Serve as a consult liaison for Portsmouth Regional Hospital (PRH) Emergency Department as well as teaching psychiatry residents on CL/ED rotation at PRH. Available academic appointment at Tufts University. Monday-Friday work schedule, **no weekend call**.
- **Psychiatrist** – Derry NH –Hospitalist for Parkland Medical Center's Behavioral Health Unit, as well as covering the Partial Hospitalization Program and Eating Disorders Treatment Center. *Flexible shifts; generous hourly pay; and flexible call rotation.*
- **Adult & Geriatric Psychiatrist** – Rochester, NH – Adult and Geriatric Psychiatric for Frisbie Memorial Hospital's employed practice. Can provide both inpatient and outpatient care. Geriatric fellowship preferred: ECT therapy a plus! Mon-Fri work schedule; and flexible call rotation.

### Qualified Candidates:

- Completion of an accredited residency program in Psychiatry
- Certified / Re-Certified (if applicable) by the American Board of Psychiatry
- Excellent interpersonal and communication skills

### Incentive/Benefits Package:

- Competitive compensation with occurrence-based malpractice with tail coverage
- Comprehensive benefits package including commencement bonus; CME monies and time
- Faculty appointment to Tufts University School of Medicine is available

**Portsmouth Regional Hospital** is a 220-bed acute care facility with a Level II Trauma Center; 24/7 full-service ER; dedicated Hospitalist and Intensivist program. The inpatient psychiatric unit is a 30-beds, this includes 16 involuntary beds. Portsmouth Regional is home to our Psychiatry Residency Program which was initiated in summer 2021.

To learn more about us and to share your professional interests, please contact Char Plotycia, Physician Recruiter, at 913-558-2469 or [charlene.plotycia@hcahealthcare.com](mailto:charlene.plotycia@hcahealthcare.com).

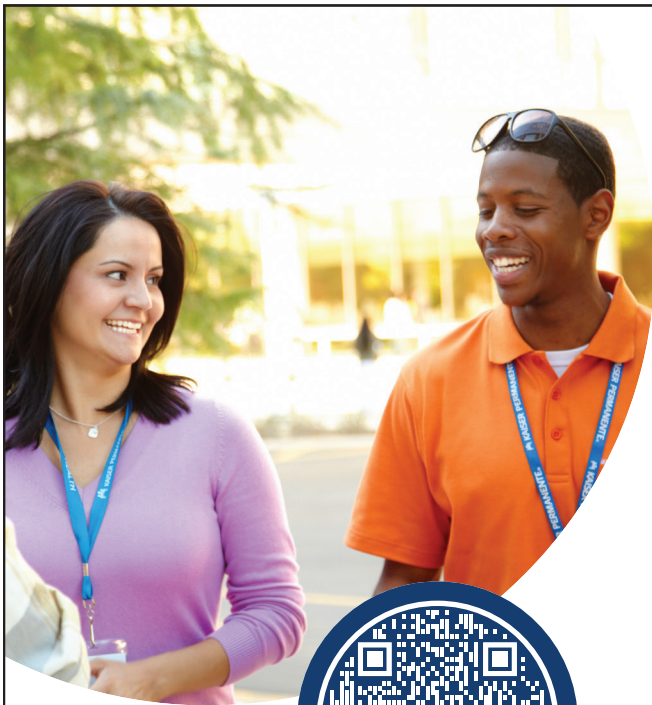

PERMANENTE MEDICINE®

## Psychiatrists

If you're ready to practice medicine you can believe in, we want to hear from you

Permanente Medicine is medicine you can believe in. You'll be empowered to focus on your patients, so you can practice as you always intended: With compassion and respect for your patients' needs and preferences. At every step, you'll have the support of experienced care teams, the best clinical evidence, and trailblazing technologies that help make care delivery efficient, effective, and personalized.

You'll receive excellent compensation, a broad range of benefits, and a generous retirement package.

Fulfill the promise of medicine in a professional environment as concerned with your health and wellness as we are our patients.

Explore your opportunities at:  
[bit.ly/PMpsychiatry](https://bit.ly/PMpsychiatry)

*When required by law, wage ranges are posted on the medical group websites.*

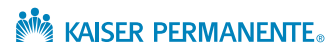

Scan here to take the next step in your Psychiatry career.

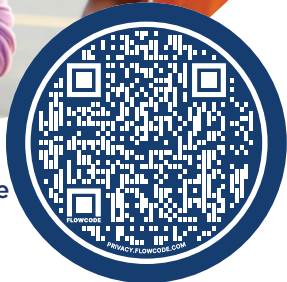

We are an EOE/AA/M/F/D/V employer.

## APA IS SEEKING APPLICANTS for the position of **MEDICAL EDITOR-IN-CHIEF** of

# PSYCHIATRIC NEWS

The Medical Editor-in-Chief is responsible for helping to determine the editorial philosophy and medical content of *Psychiatric News* in its print and digital formats and ensuring that the content is accurate, relevant, useful, objective, and balanced. The individual works collaboratively with the APA CEO/Medical Director, Chief of Communications, and Executive Editor.

**Applicants must be APA members** who have administrative experience, are passionate about disseminating news in the field of psychiatry, and are knowledgeable about print and digital communications.

**Deadline for applications**, which should include a letter of interest and a curriculum vitae, is **July 19, 2023**. This is a paid, part-time position.

Applications should be sent by email to  
[editor@psych.org](mailto:editor@psych.org)

See complete position description:

[apapsy.ch/PN\\_editor](https://apapsy.ch/PN_editor)

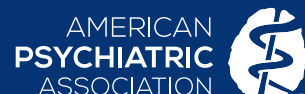

# Telepsychiatry is transforming mental healthcare; but with new technology comes new risks.

With data breaches and cyber attacks becoming increasingly common, having the right cyber protection in place is critical. Whether you are in private practice or work within an organization, psychiatrists who maintain confidential patient / employee information have a responsibility to safeguard that data.

**Cyber Suite** through American Professional Agency, Inc., is an endorsement to your professional liability coverage.

It's simple to add with no lengthy forms to fill out.

American Psychiatric Association Endorsed  
Professional Liability Insurance Program



Adding the Cyber Suite endorsement is fast and easy.

Learn more about Cyber Suite at [AmericanProfessional.com/cyber-suite-PRO](https://AmericanProfessional.com/cyber-suite-PRO)  
or call (800) 421-6694 Ext. 2318.

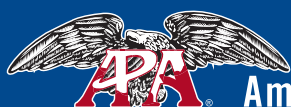

**American Professional Agency**

LEADERS IN PSYCHIATRIC MEDICAL LIABILITY INSURANCE

ENDORSED BY THE

AMERICAN  
PSYCHIATRIC  
ASSOCIATION

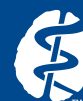

Source: http://ajp.psychiatryonline.org/doi/suppl/10.1176/ajp.2023.180.issue-6/suppl_file/back.pdf
