# The American Journal of Psychiatry

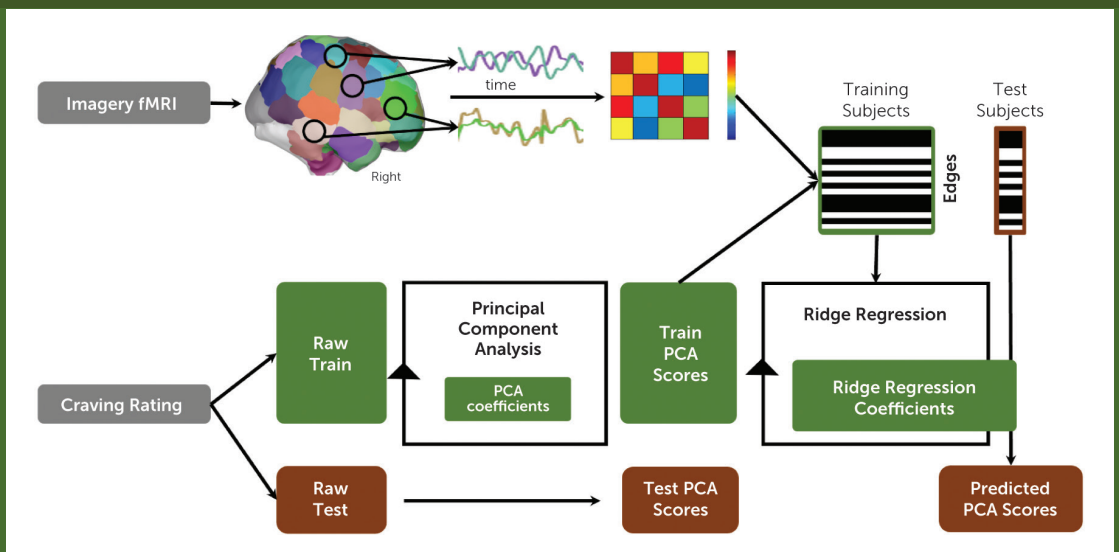

Fentanyl and Other Opioid Use Disorders:  
Treatment and Research Needs

Opioid Prescribing and Suicide Risk in the United States

Racial and Ethnic Bias in the Diagnosis of  
Alcohol Use Disorder in Veterans

Transdiagnostic Connectome-Based  
Prediction of Craving
