## Subscription and Business Information

*The American Journal of Psychiatry*, ISSN 0002-953X, is published monthly by the American Psychiatric Association.

The American Psychiatric Association does not hold itself responsible for statements made in its publications by contributors or advertisers. Unless so stated, material in *The American Journal of Psychiatry* does not reflect the endorsement, official attitude, or position of the American Psychiatric Association or of the Journal's Editorial Board.

Periodicals postage paid at Washington, DC, and additional mailing offices. POSTMASTER: Send address changes to *The American Journal of Psychiatry*, Circulation Department, American Psychiatric Association, 800 Maine Avenue, S.W., Suite 900, Washington, D.C. 20024.

### Editorial Office

*American Journal of Psychiatry*  
American Psychiatric Association  
800 Maine Avenue, S.W., Suite 900  
Washington, D.C. 20024  
E-mail: [ajp@psych.org](mailto:ajp@psych.org)

### Customer Service

Phone: (800) 368-5777 (toll-free)  
E-mail: [appi@psych.org](mailto:appi@psych.org)

### APA Member Subscription Services

Phone: (888) 35-PSYCH (toll-free)

### Subscriptions

Regular and resident-fellow members in the U.S. receive print and online access as a **member benefit**. Subscriptions for non-members start at \$378 per year. Online only subscriptions start at \$342 per year. Go to <https://www.appi.org/ajp> for more information.

Institutional subscriptions are tier priced. For institutional site license or pricing information, contact (202) 559-3729 or [institutions@psych.org](mailto:institutions@psych.org).

*Additional subscription options, including single issues and student rates*  
Contact Customer Service

### Advertising

*Pharmaceutical Print and Online Advertising*  
Frank Cox, Kathleen Harrison, Tim Wolfinger  
Pharmaceutical Media, Inc.  
30 East 33rd Street  
New York, NY 10016  
Phone: (212) 904-0379  
E-mail: [twolfinger@pminy.com](mailto:twolfinger@pminy.com)

*Nonpharmaceutical and Online Sales*  
Eamon Wood  
Pharmaceutical Media, Inc.  
E-mail: [ewood@pminy.com](mailto:ewood@pminy.com)  
(see address and phone above).

### Permissions and Reprints

Material published in the journals of the American Psychiatric Association and American Psychiatric Association Publishing is protected by copyright and all rights are reserved. Material may not be reproduced in any form or by any means without written permission from the copyright owner. For permission to reproduce material published by APA, please visit <http://www.appi.org/customer-service/permissions> for more information. Permission can also be secured through the Copyright Clearance Center ([www.copyright.com](http://www.copyright.com)).

APA does not require that permission be obtained for the photocopying of isolated articles for nonprofit classroom or library reserve use; all fees associated with such permission are waived. This consent does not extend to other kinds of copying, such as copying for general distribution, for advertising or promotional purposes, for creating new collective works, or for resale. Requests for commercial distribution and bulk reprints should be directed to (202) 609-7075.

Indexed in Abstracts for Social Workers, Academic Abstracts, Biological Abstracts, Chemical Abstracts, Chicago Psychoanalytic Literature Index, Cumulative Index to Nursing Literature, Excerpta Medica, Hospital Literature Index, Index Medicus, International Nursing Index, Nutrition Abstracts, Psychological Abstracts, Science Citation Index, Social Science Source, and Social Sciences Index.

Pages are produced by TNQ Technologies (Chennai, India) effective with Volume 179, Number 3, March 2022, and printed by Sheridan NH (Hanover, NH) on acid-free paper effective with Volume 169, Number 1, January 2012.

© 2023 American Psychiatric Association.

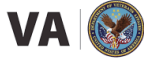

U.S. Department of Veterans Affairs  
Veterans Health Administration  
VA Sunshine Healthcare Network (VISN 8)

The VISN 8 Sunshine Healthcare Network is recruiting psychiatrists for all our 140+ locations associated with seven healthcare systems located in Florida, South Georgia, and Virgin Islands. For more information on locations please [Click Here](#).

Our psychiatrists are essential leaders for mental health services located throughout our systems of care. They provide excellence in mental health care while working at our state-of-the-art facilities in settings that continue to grow and expand program development. Mental health services are located throughout the continuum of care with opportunities available in outpatient, inpatient, emergency services, select virtual and residential treatment settings. Our medical centers have academic affiliations and have opportunities to engage in teaching and research while providing the highest standard of mental health services.

With sunshine all year and no snow, you can enjoy many outdoor activities within a culturally diverse community.

Salary Range: Will vary by location; negotiable

What can work for VISN 8 Sunshine VA Medical Centers do for you:

- Robust federal benefits package including retirement plan
- Separate 401K with partial agency matching
- Competitive Pay
- Qualified candidates may be eligible for relocation, recruitment bonus
- Assistance with payment of outstanding medical school loans may be available up to \$200K
- Malpractice: Liability protection with tail coverage
- Twenty-six Days paid vacation
- Thirteen Days sick time per year with unlimited carry over
- Eleven Federal holidays with pay
- Health, dental and vision insurance
- Large and dynamic VA medical centers with continued growth
- Academic opportunities training medical students and psychiatry residents
- Leadership and supervisory opportunities
- Integrated team based mental health treatment from outpatient care to intensive outpatient treatment, residential treatment and high acuity inpatient care.
- National leaders in Primary Care Mental Health
- National leaders in Residential Treatment Programming
- Esketamine programs available at select medical centers
- ECT and rTMS services available

Benefits to living in Florida:

- No state income tax in Florida
- Over 1,350 miles of coastlines and beaches to enjoy; 300 miles in Puerto Rico
- Nationally recognized VA medical centers
- Sunny and warm climate with numerous outdoor activities and events throughout the year
- Culturally diverse

Americas Veterans need you! Please send your CV, cover letter and any questions you may have to [VHAV08PureT38rec@va.gov](mailto:VHAV08PureT38rec@va.gov)

## Assistant/Associate/Professor of Clinical Pediatric Psychiatry

(Search Extended through 7/24/2023)

**Hiring Department:** UICOMP-Pediatrics

**Location:** Peoria, IL USA

**Requisition ID:** 1014947

**Posting Close Date:** 7/24/2023

The University of Illinois College of Medicine at Peoria (UICOMP) seeks physicians for positions at the level of Professor, Associate Professor or Assistant Professor to enhance an important clinical program. Pediatric Psychiatrist positions require candidates who are BC in Psychiatry and have completed 4 years in residency and 2 years in fellowship training in Pediatric Psychiatry. Candidates with scholarly and research interests are highly desirable, along with experience in teaching medical students and residents.

UICOMP is one of the regional campuses that make up the nation's largest public medical school. The Peoria campus is known among students for its small class sizes, rigorous curriculum and hands-on clerkships; to residents and fellows for the strong academic setting, large referral base and exceptional facilities; and by physicians seeking the ideal combination of teaching and practicing medicine in a research-based university setting.

UICOMP's main clinical partner is OSF Healthcare Children's Hospital of Illinois, a 136-bed, full-service hospital, with physicians in more than 140 subspecialties. Located on the campus of OSF St. Francis Medical Center, it's the pediatric teaching affiliate of UICOMP, the state's only major pediatric teaching hospital outside Chicago—and home to groundbreaking pediatric research in medicine. The hospital is also proud to house the St. Jude Midwest Affiliate, which brings some of the care and services offered by St. Jude in Memphis to central Illinois.

Malpractice insurance is provided by the University of Illinois system and an excellent benefits package is available including vacations, sick time, CME, health and life insurance and retirement plan.

### Position Summary

Provide outpatient diagnostic and management services for patients in the region with general Psychiatry needs and participate in undergraduate, graduate and continuing education programs of the Department.

### Duties & Responsibilities

- Responsibilities – Psychiatrist
- Participate in undergraduate, graduate and continuing education programs of the Department.
- Provide outpatient diagnostic and management services for patients in the region with general Psychiatry needs.
- Provide inpatient Psychiatry consultation for children.
- Organize and conduct research programs in Child Psychiatry.
- Perform other duties of a University faculty member including committee assignments, curriculum development, student counseling, and administration.

### Minimum Qualifications

- Eligible for licensure in Illinois.
- Board Certified in Psychiatry.
- Board Certified/Board Eligible in Pediatric Psychiatry.

For fullest consideration please submit your application by 5/15/2023 at:

<https://uic.csod.com/ux/ats/careersite/1/home/requisition/1804?c=ui>

*The University of Illinois System is an equal opportunity employer, including but not limited to disability and/or veteran status, and complies with all applicable state and federal employment mandates. Please visit Required Employment Notices and Posters at <https://www.hr.uillinois.edu/cms/one.aspx?portalId=4292&pageId=5705> to view our non-discrimination statement and find additional information about required background checks, sexual harassment/misconduct disclosures, COVID-19 vaccination requirement, and employment eligibility review through E-Verify.*

*As an EOE/AA employer, the University of Illinois encourages applications from individuals regardless of an applicant's race, color, religion, sex, gender identity, sexual orientation, national origin, and Veteran or disability status.*

*The university provides accommodations to applicants and employees. Request an Accommodation at <https://jobs.uic.edu/request-and-accomodation/>.*

# THE AMERICAN PSYCHIATRIC ASSOCIATION

800 Maine Avenue, S.W., Suite 900, Washington, D.C. 20024

(888) 357-7924 (toll-free inside the U.S. and Canada)

web site: [www.psychiatry.org](http://www.psychiatry.org) • e-mail: [apa@psych.org](mailto:apa@psych.org)

## Chairpersons of Councils, Committees, and Task Forces

### Standing Committees

|                             |                              |
|-----------------------------|------------------------------|
| <b>Bylaws</b>               | Edward R. Herman, J.D., M.D. |
| <b>Elections</b>            | Josepha A. Cheong, M.D.      |
| <b>Ethics</b>               | Charles Dike, M.D.           |
| <b>Finance and Budget</b>   | Ann T. Sullivan, M.D.        |
| <i>Audit</i>                | Richard F. Summers, M.D.     |
| <i>Investment Oversight</i> | Steven S. Sharfstein, M.D.   |
| <b>Joint Reference</b>      | Petros Levounis, M.D., M.A.  |
| <b>Membership</b>           | Gail Robinson, M.D.          |
| <b>Nominating</b>           | Vivian B. Pender, M.D.       |
| <b>Tellers</b>              | Mariam F. Aboukar, D.O.      |

### Non-Standing Committee

|                             |                               |
|-----------------------------|-------------------------------|
| <b>Conflict of Interest</b> | Sandra M. DeJong, M.D., M.Sc. |
|-----------------------------|-------------------------------|

### Councils

#### Council on Addiction Psychiatry

Smita Das, M.D., M.P.H., Ph.D.

#### Council on Advocacy and Government Relations

Katherine G. Kennedy, M.D.

*Advocacy and Litigation Funding*

Patrick Aquino, M.D.

#### Council on Children, Adolescents, and Their Families

Anish R. Dube, M.D., M.P.H.

*Women's Mental Health*

Ludmila B. De Faria, M.D.

#### Council on Communications

Howard Liu, M.D., M.B.A.

#### Council on Consultation-Liaison Psychiatry

Maria L. Tiamson-Kassab, M.D.

#### Council on Geriatric Psychiatry

Maria D. Llorente, M.D.

#### Council on Healthcare Systems and Financing

Robert L. Trestman, M.D., Ph.D.

*Integrated Care*

Benjamin G. Druss, M.D.

*RBRVS, Codes and Reimbursement*

Jeremy S. Musher, M.D.

*Reimbursement for Psychiatric Care*

Brian Hepburn, M.D.

*Telepsychiatry*

Shabana Khan, M.D.

#### Council on International Psychiatry and Global Health

Pamela Collins, M.D., M.P.H.

#### Council on Medical Education and Lifelong Learning

Art Walaszek, M.D.

*Innovation*

Steven Chan, M.D., M.B.A.

*Scientific Program*

Eric Williams, M.D.

*Scientific Program—Mental Health Services Conference*

*(Oct. to Oct. tenure)*

John Santopietro, M.D.

*Vestermark Award Committee*

Donna M. Sudak, M.D.

*Well-being and Burnout*

Uchenna Okoye, M.D., M.P.H.

#### Council on Minority Mental Health and Health Disparities

Walter Wilson, Jr., M.D.

#### Council on Psychiatry and Law

Richard Martinez, M.D., M.H.

*Judicial Action*

Reena Kapoor, M.D.

#### Council on Quality Care

Carol L. Alter, M.D.

*Mental Health Information Technology*

John Torous, M.D.

*Quality and Performance Measurement*

David S. Kroll, M.D.

*Practice Guidelines*

Daniel J. Anzia, M.D.

#### Council on Research

Jonathan E. Alpert, M.D., Ph.D.

*Climate Change and Mental Health*

Elizabeth Haase, M.D.

*Psychiatric Dimensions of Disasters*

Joshua C. Morganstein, M.D.

*APA Officers and Chairpersons for 2023–2024 took office at the conclusion of the APA Annual Meeting, after this issue went to press. The July issue of The American Journal of Psychiatry will feature these officeholders.*

# Go Online

Visit [ajp.psychiatryonline.org](http://ajp.psychiatryonline.org) for these features!

## AJP in Advance

*Discover the latest research advances before they appear in print*

### **Differences in Social Determinants of Health Underlie Racial/Ethnic Disparities in Psychological Health and Well-Being: Study of 11,143 Older Adults**

Social determinants of health accounted for the majority of the Black–White disparities in depression, cognition, and self-rated health and for the majority of the Hispanic/Latinx–White disparities in cognition and self-rated health. Other factors accounted for the Hispanic/Latinx–White disparity in depression.

## AJP Audio and Video

In the June 2023 episode of our AJP Audio podcast, Mark Olfson, M.D., M.P.H., discusses the links between opioid prescribing and suicide risk in the United States (Olfson et al., p. 418).

In an issue highlights video, AJP Deputy Editor Danny Pine also discusses the article by Olfson et al. (“Opioid Prescribing and Suicide Risk in the United States,” p. 418) as well as Garrison et al.’s article “Transdiagnostic Connectome-Based Prediction of Craving” (p. 445).

## AJP CME

You can earn CME credits by reading articles in *The American Journal of Psychiatry*. Three articles in this issue form a short course that consists of reading the article and answering three multiple-choice questions with a single correct answer for up to 1 AMA PRA Category 1 Credit™ each. Credit is issued only to subscribers of the online AJP CME Course Program.

See the list below for articles in this month’s issue that are the subject of a CME quiz.

### **In this issue**

---

Opioid Prescribing and Suicide Risk in the United States (Olfson et al., p. 418)

---

Racial and Ethnic Bias in the Diagnosis of Alcohol Use Disorder in Veterans (Vickers-Smith et al., p. 426)

---

Transition From Substance-Induced Psychosis to Schizophrenia Spectrum Disorder or Bipolar Disorder (Rognli et al., p. 437)

---

@APAPubJournals

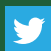

Psychiatry Online

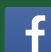

AMERICAN  
PSYCHIATRIC  
ASSOCIATION  
PUBLISHING

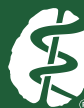

[www.appi.org](http://www.appi.org)  
1-800-368-5777  
[appi@psych.org](mailto:appi@psych.org)
